# Supplementary material for: Performance of non-invasive fibrosis scores in non-alcoholic fatty liver disease with and without morbid obesity
Source: PubMed Central journal article supplement (PMC8455320; doi:10.1038/s41366-021-00881-8), 2021-06-24

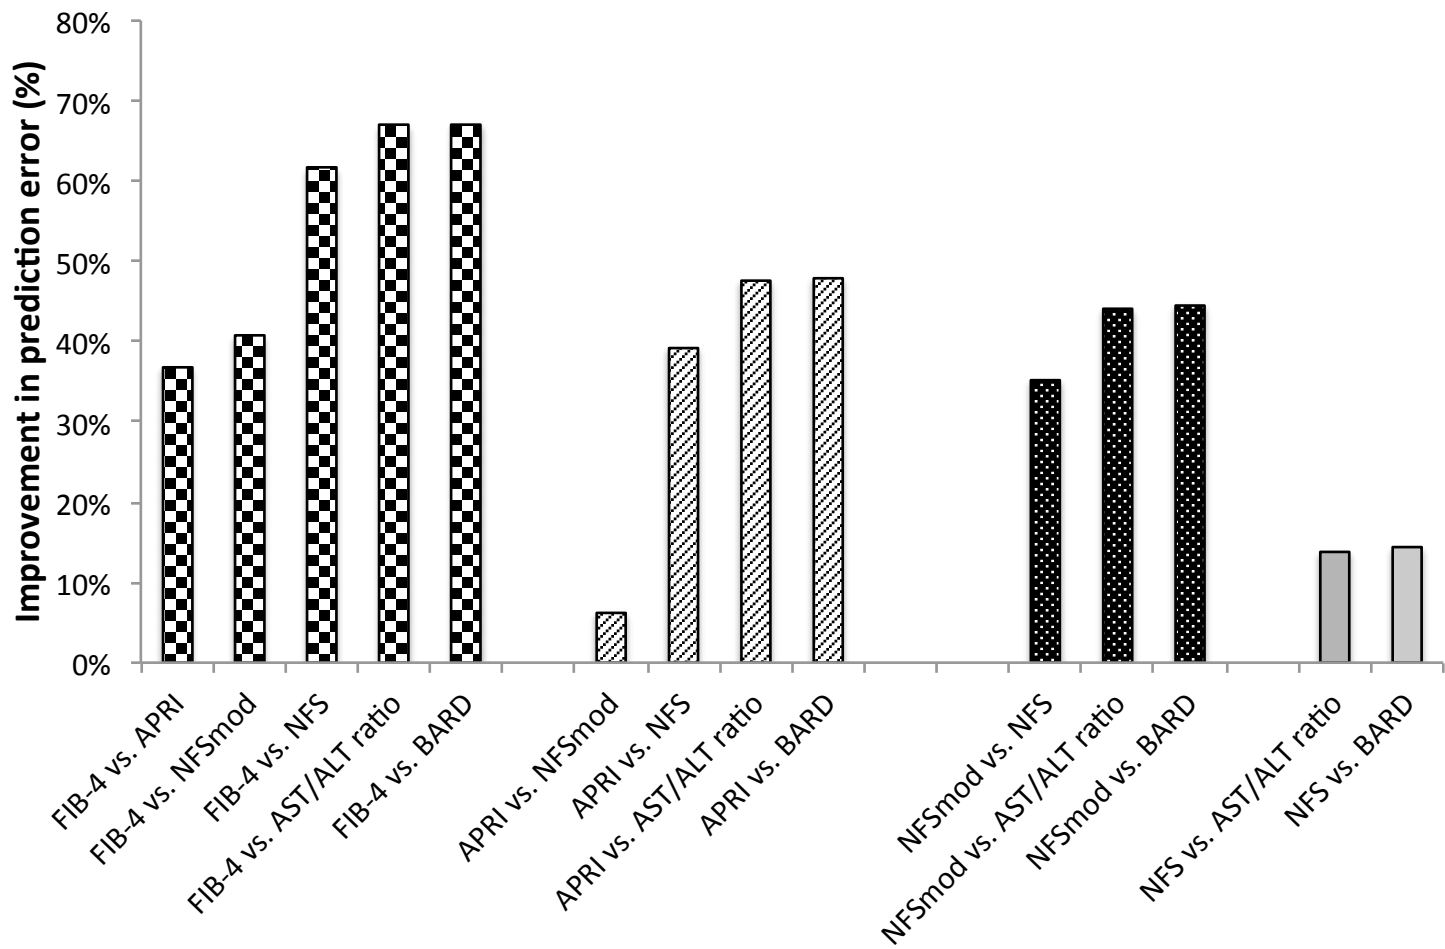

Supplement: 41366_2021_881_MOESM2_ESM.pdf [file 41366_2021_881_MOESM2_ESM.pdf]
